# Supplementary material for: A reliable procedure for the preparation of graphene-boron nitride superlattices as large area (cm × cm) films on arbitrary substrates or powders (gram scale) and unexpected electrocatalytic properties
Source: Royal Society of Chemistry journal article supplement (doi:10.1039/c8nr08377k), 2019-01-01
Supplement: c8nr08377k1.pdf [file c8nr08377k1.pdf]

## Supplementary information

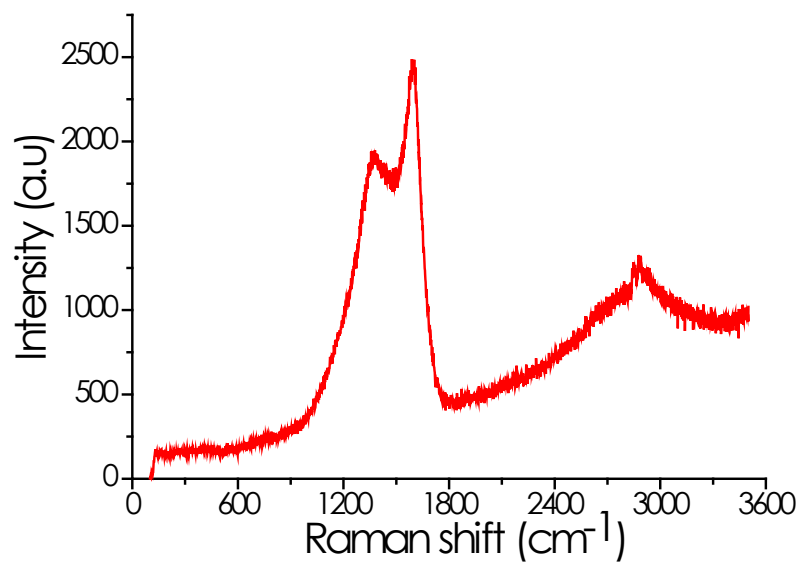

### S.1. Raman graphene from polystyrene

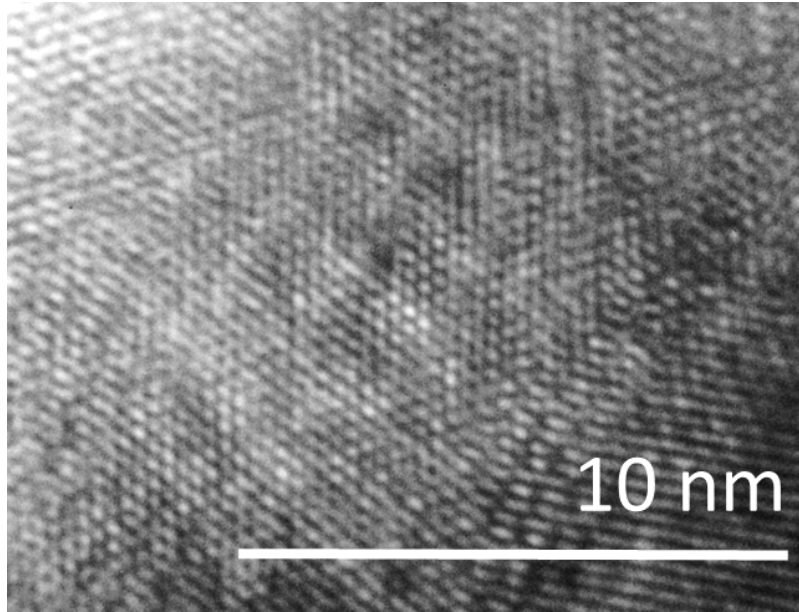

S.2. High resolution transmission electron microscopy graphene from polystyrene

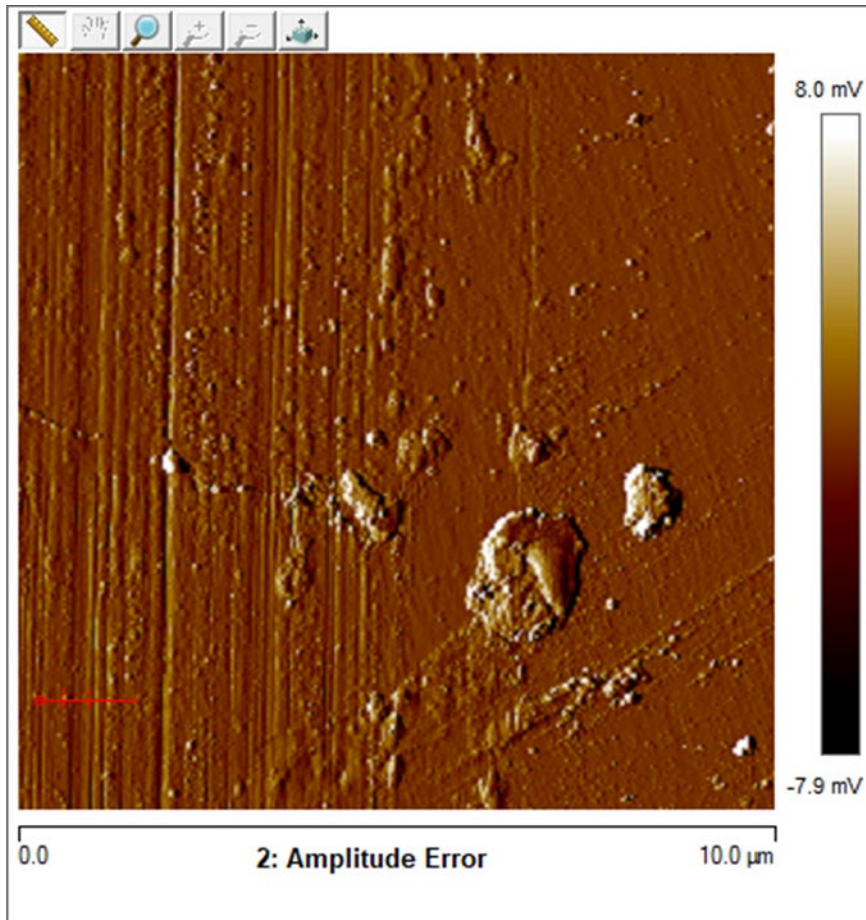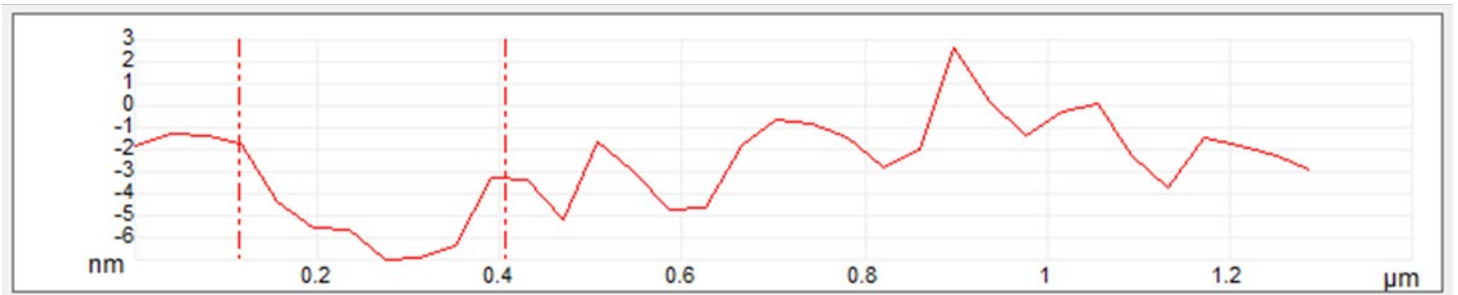

S.3. AFM image of graphene film from polystyrene where the thickness is measured doing a scratch in the film obtaining a value of 4-5 nm corresponding to a few layers graphene.

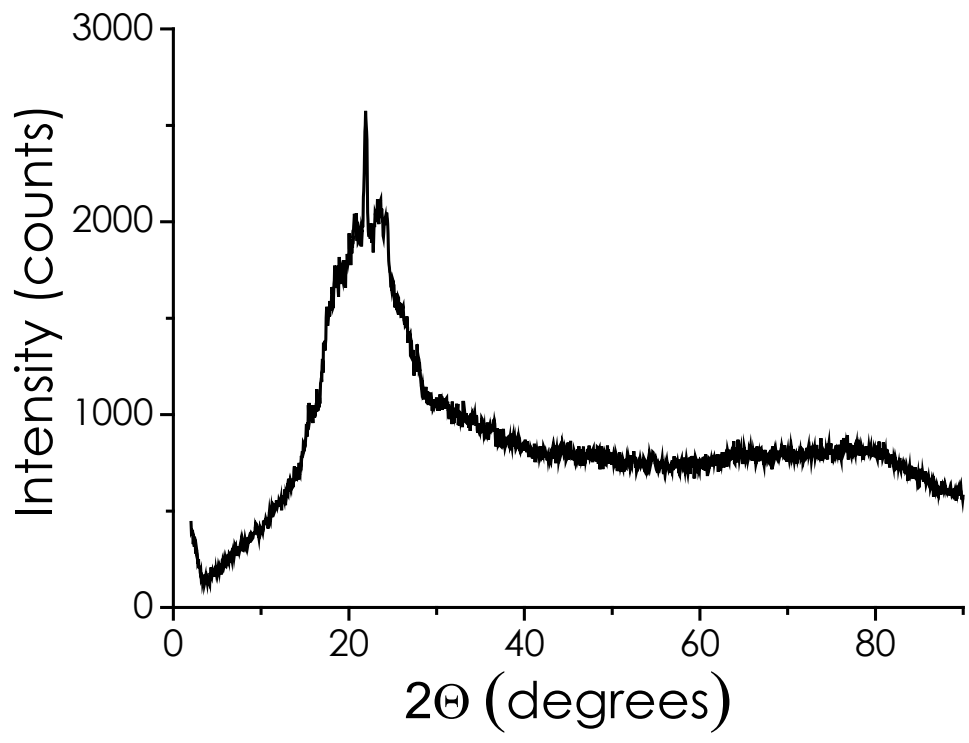

S.4. XRD graphene from polystyrene

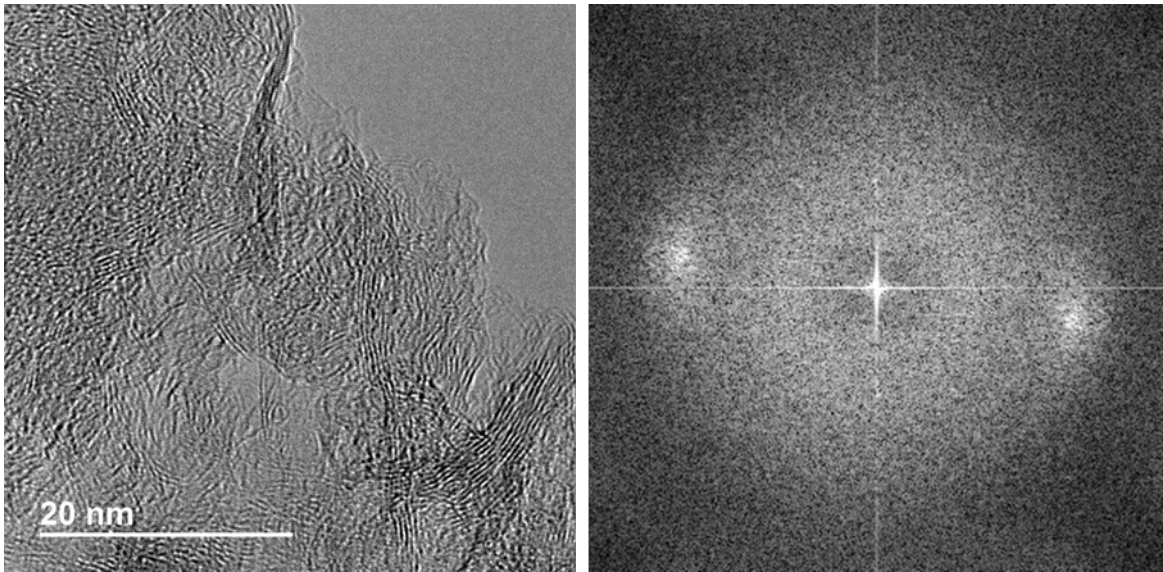

S.5. TEM and SAED images of commercial G and BN sheets mixtures after pyrolysis.

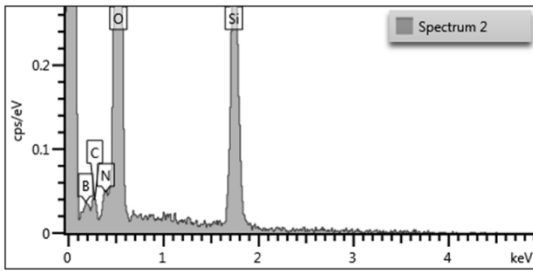

| Element | Line Type | Apparent Concentration | k Ratio | Wt%   | Wt% Sigm | Standard Label | Factory |
|---------|-----------|------------------------|---------|-------|----------|----------------|---------|
| B       | K series  | 0.12                   | 0.00049 | 38.09 | 35.29    | BN             | Yes     |
| C       | K series  | 0                      | 0.00005 | 6.64  | 17.32    | CVit           | Yes     |
| N       | K series  | 0.34                   | 0.00061 | 55.27 | 13.58    | BN             | Yes     |
| Total:  |           |                        |         | 100   |          |                |         |

|   |            |  |
|---|------------|--|
| B | 3.5 moles  |  |
| N | 3.9 moles  |  |
| C | 0.55 moles |  |

### S.6. EDS analysis of G-BN film on quartz substrate.

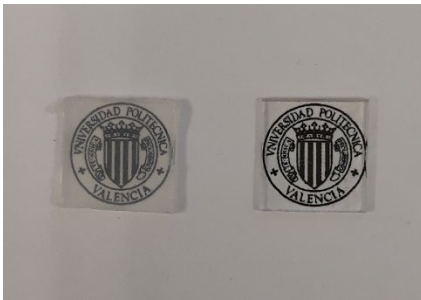

S7. Photographs of PS-BN (left) and G-BN superlattice (right) films.

Table S.1. Values of the impedance parameters determined for EIS spectra of G-BN superlattice and random G-BN assembly sheets in Figure 2, recorded in contact with air-saturated 0.10 M potassium phosphate aqueous buffer at pH 7.0; bias potential  $-0.60$  V vs. Ag/AgCl using the equivalent circuits depicted in Figures 2a, 2b, respectively. Averaged values from three independent measurements.

| Element                              | G from PS                   | G-BN random assembly        | G-BN superlattice           |
|--------------------------------------|-----------------------------|-----------------------------|-----------------------------|
| $R_s$ ( $\Omega$ )                   | 200                         | 160                         | 250                         |
| $R_{ct}$ ( $\Omega$ )                | 7900                        | 3800                        | 1450                        |
| $Q_{dl}$ ( $\Omega s^{-n}$ ) ( $n$ ) | $6.8 \times 10^{-5}$ (0.92) | $8.6 \times 10^{-5}$ (0.99) | $3.0 \times 10^{-5}$ (0.81) |
| $W$ ( $\Omega s^{-1/2}$ )            | $2.3 \times 10^{-3}$        | $7.3 \times 10^{-4}$        | $4.4 \times 10^{-3}$        |
